# Supplementary material
Source: publisher figshare collection journal article supplement (https://aacr.figshare.com/articles/dataset/_/22429951)
Supplement: Supplementary file 1 [file 39876286]

**Fig S2.**

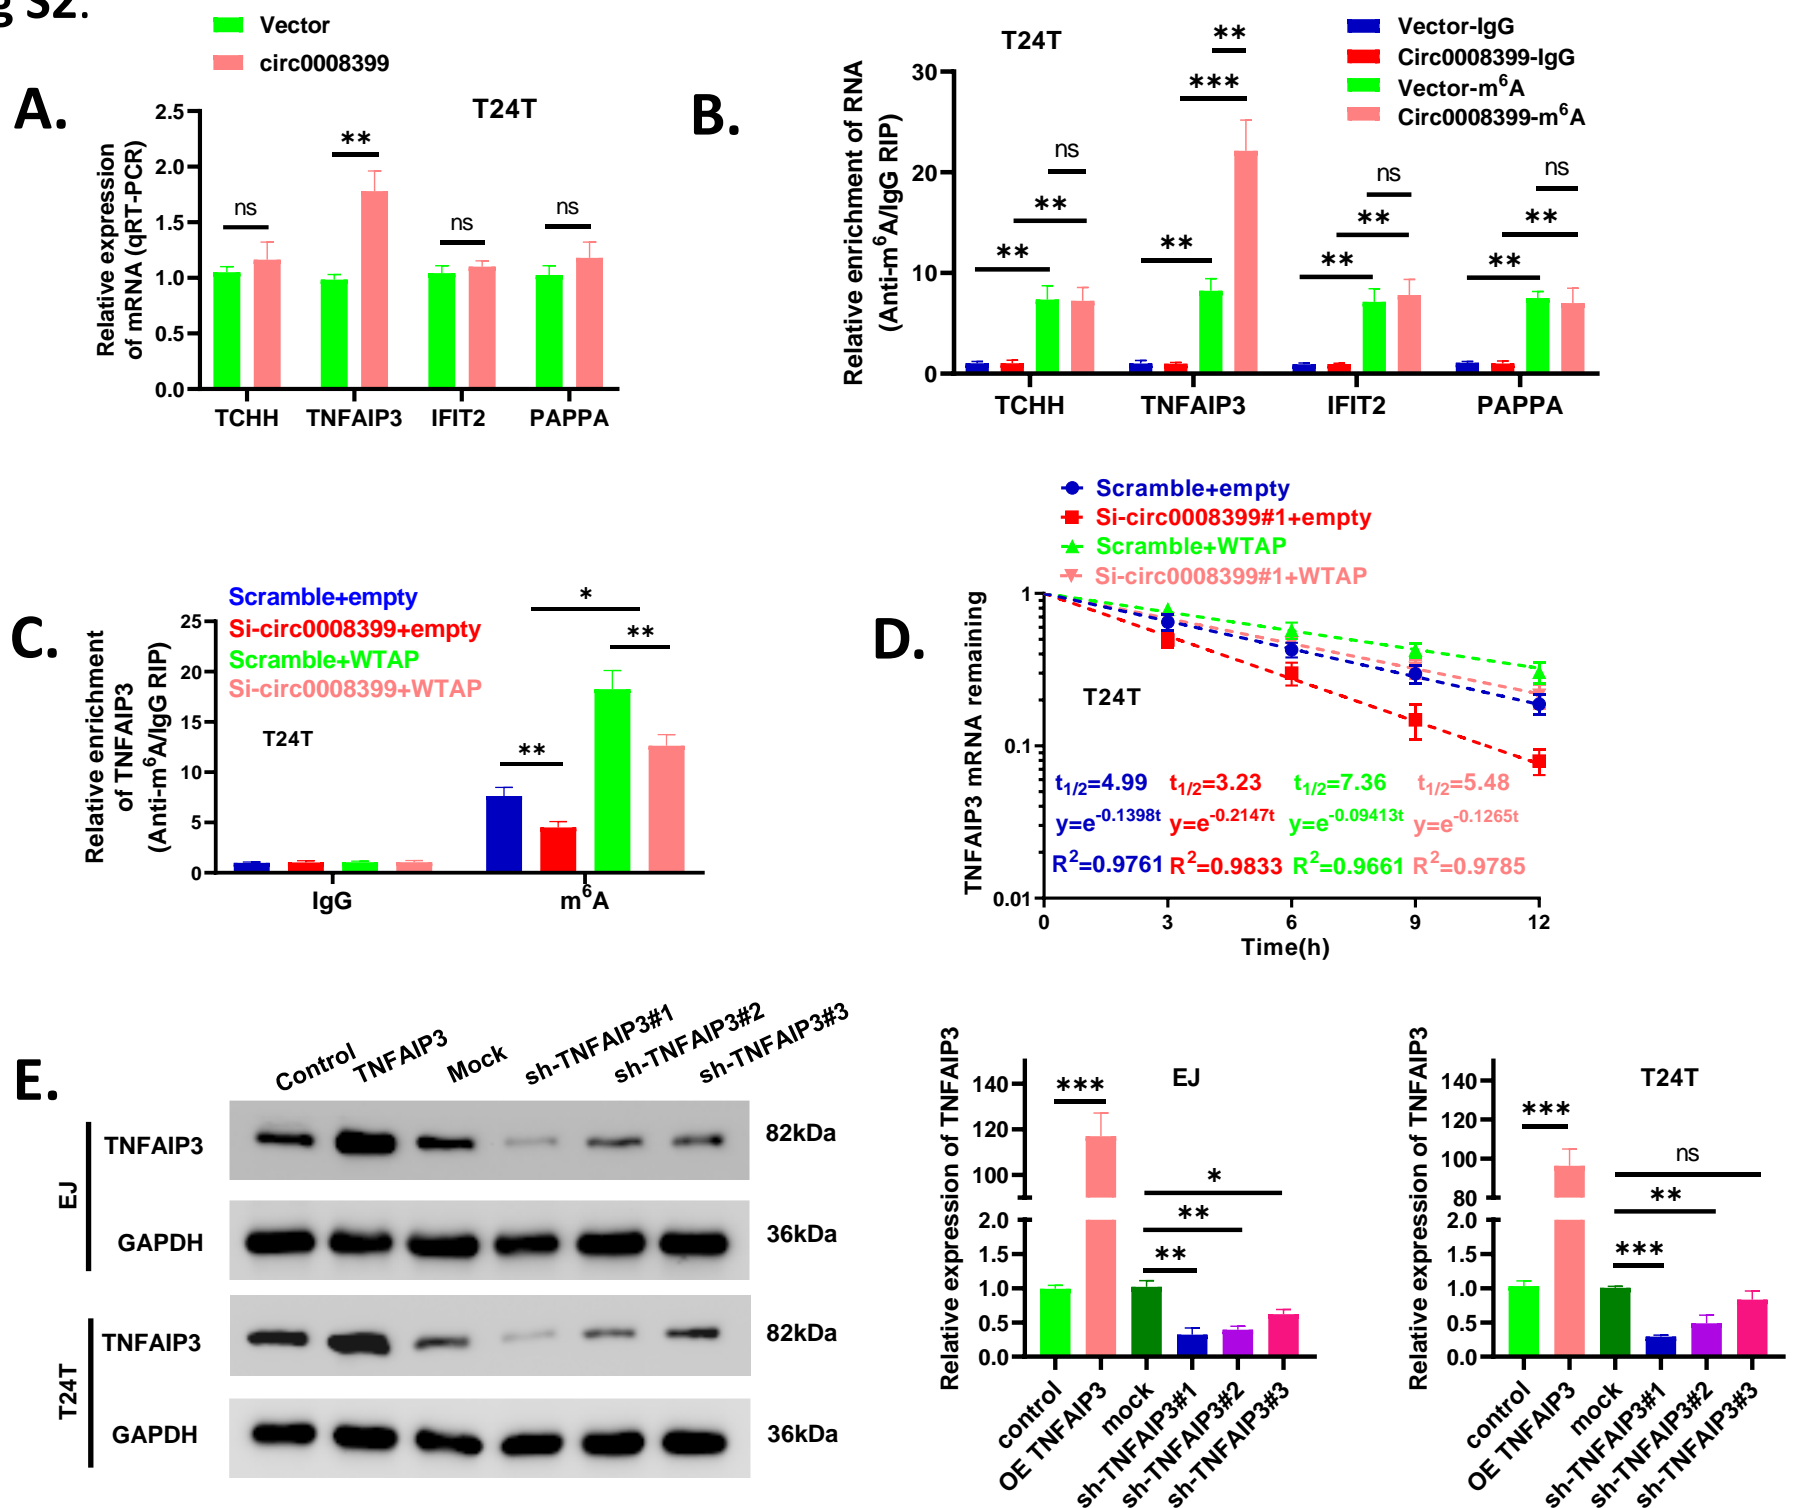

**Supplementary Fig.2 The m<sup>6</sup>A modification of TNFAIP3 mRNA and its expression are regulated by circ0008399 and WTAP.**

(A) The relative expression levels of four mRNAs candidates were detected by qRT-PCR in T24T cells stably transfected with vector or circ0008399.

(B) RIP-qPCR revealed the relative m<sup>6</sup>A modification levels of four mRNAs candidates in T24T cells stably transfected with vector or circ0008399.

(C) RIP-qPCR showed the relative m<sup>6</sup>A modification levels of TNFAIP3 mRNA upon T24T cells transfected with scramble or si-circ0008399#1, and those co-transfected with empty and WTAP.

(D) The relative remaining mRNA levels of TNFAIP3 was analyzed by qRT-PCR after treatment with actinomycin D (5 μg/ml) at the indicated time points in T24T cells transfected with scramble or si-circ0008399, and those co-transfected with empty or WTAP.

(E) The expression levels of TNFAIP3 in EJ and T24T cells after transfection of control, TNFAIP3 or mock, sh-TNFAIP3#1, sh-TNFAIP3#2, sh-TNFAIP3#3 plasmids were detected by western blot (left panel) and qRT-PCR (right panel).

Data are presented as the means ± SD from three independent experiments. \*P < 0.05; \*\*P < 0.01; \*\*\*P < 0.001 (Student's t test)
